# Supplementary material
Source: PubMed Central journal article supplement (PMC3536166)
Supplement: JB.01491-12_zjb999092355so1.pdf [file JB.01491-12_zjb999092355so1.pdf]

# Fig. S1A. Map of pFD1045

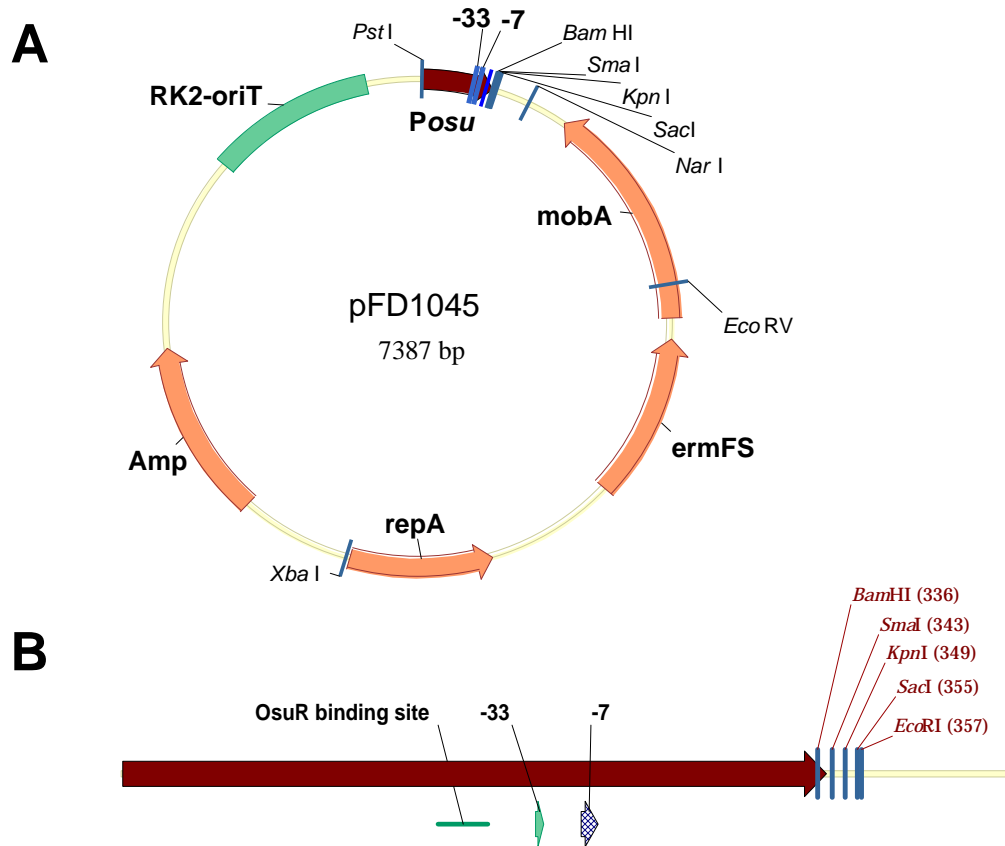

Fig. S1A. Maltose inducible expression plasmid pFD1045. A) map showing entire 7.4 kb plasmid and unique restriction sites. B) 400 bp from the promoter region of the *osuA* gene showing the *osu* promoter conserved -7 and -33 sites and the maltose responsive OsuR binding site. There is 107 bp from the transcription initiation site to the BamHI site.



# Fig. S2A. Map of pFD1146

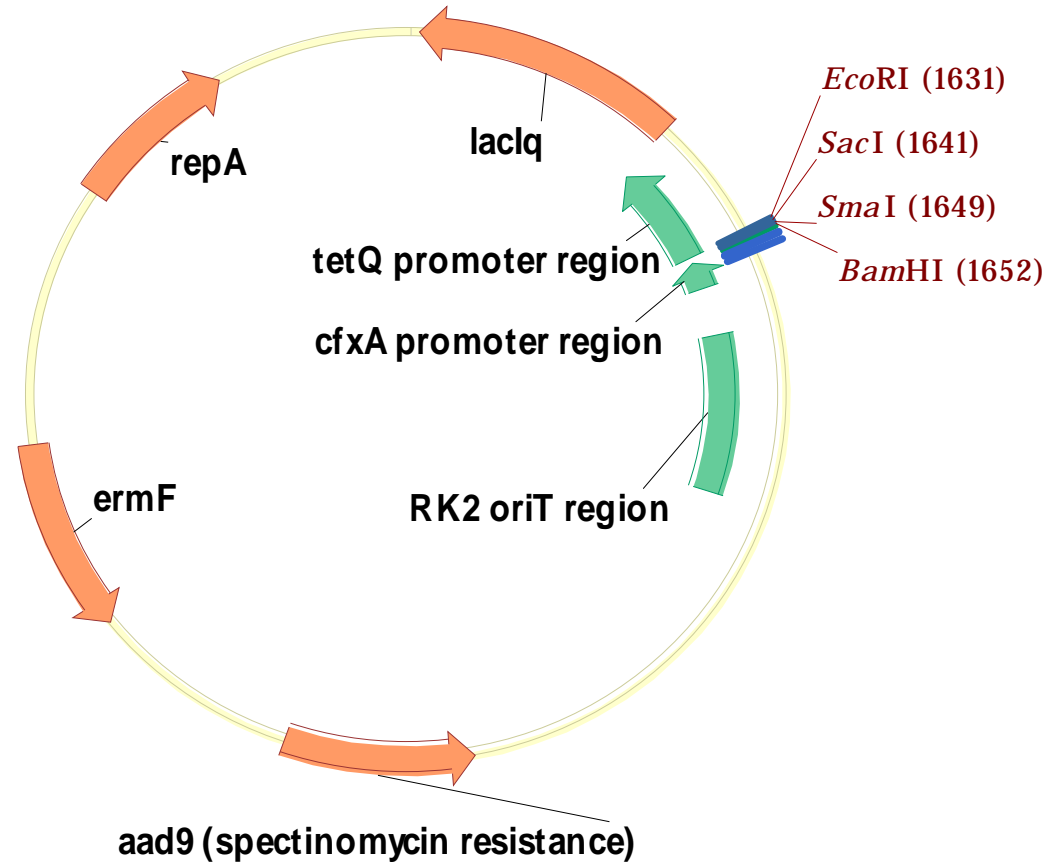

Fig. S2A. IPTG inducible expression plasmid pFD1146. Map showing the 9.4 kb plasmid and unique restriction sites that can be used for cloning target genes

# Fig. S2B. IPTG Inducible Promoter of pFD1146

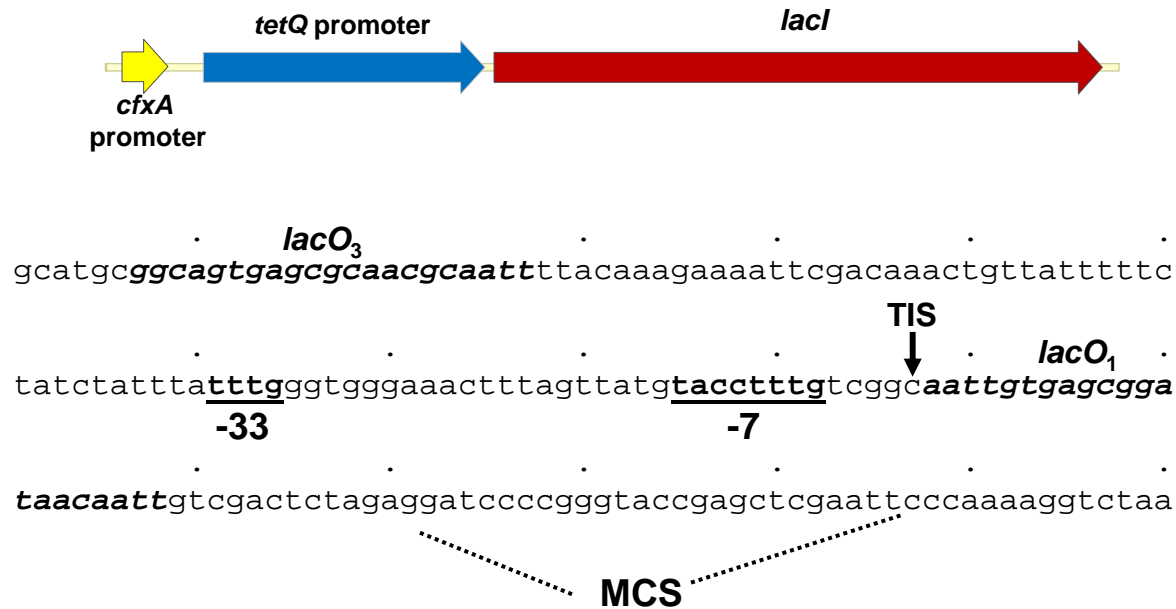

Fig. S2B. The *lacO* binding sites were engineered into the *Bacteroides cfxA* promoter shown with the conserved -7 and -33 sites. The *lacI* gene was cloned downstream under control of the *tetQ* promoter and engineered with a *Bacteroides* ribosome binding site to assure expression in the *Bacteroides* host. The DNA sequence shows the *cfxA* promoter region and multiple cloning site (MCS) with unique restriction sites.

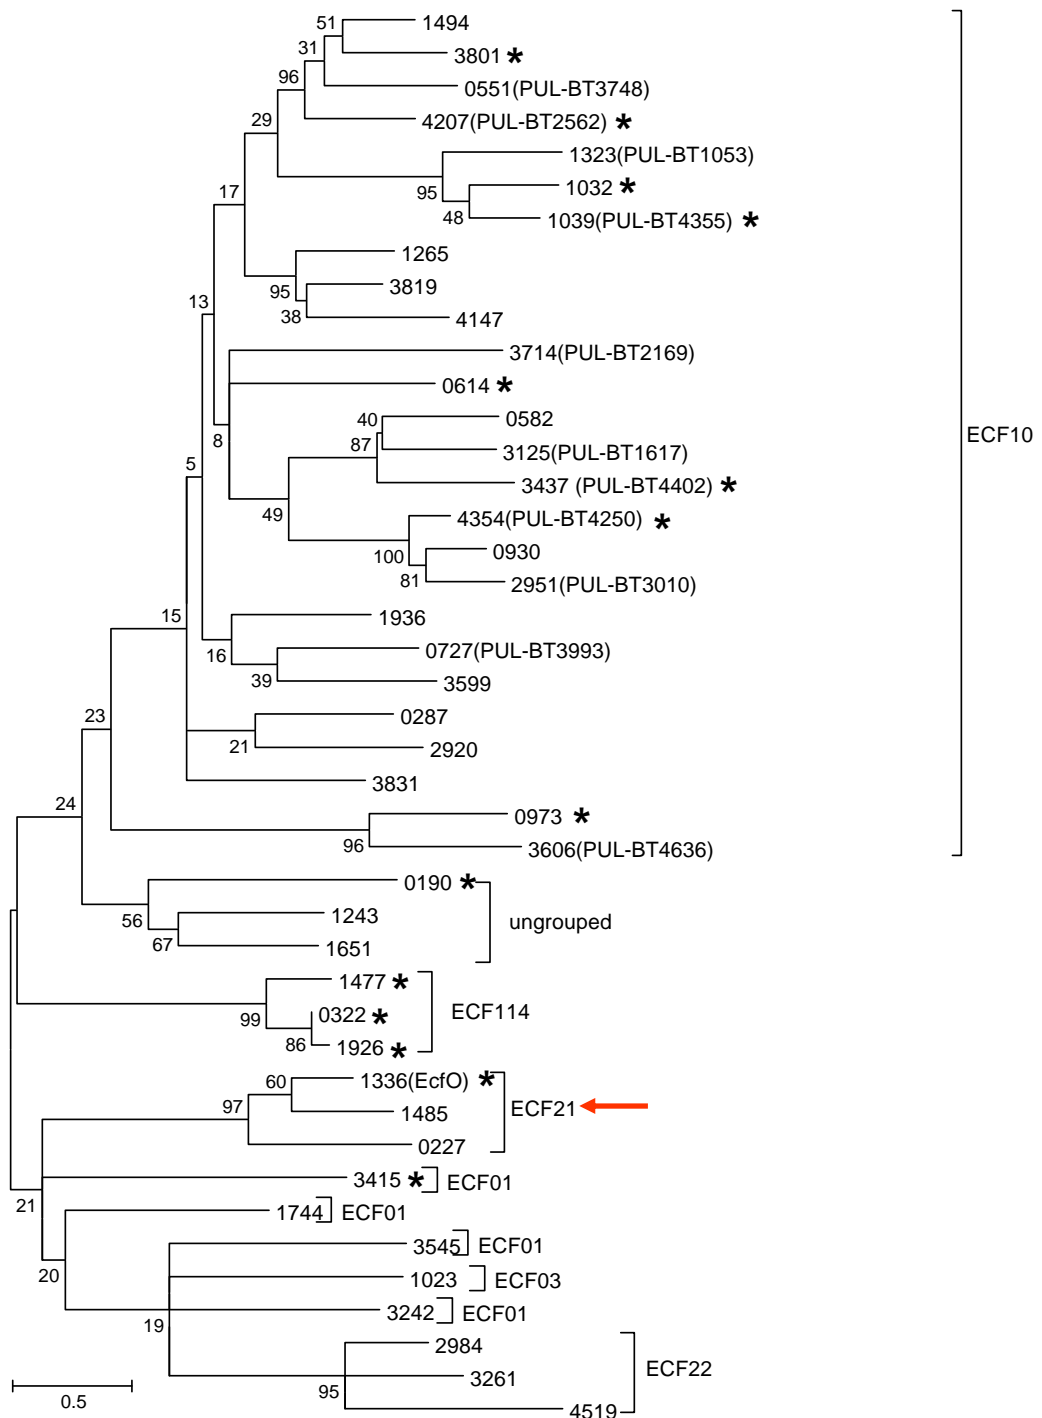

**Fig. S3. Structural diversity of *B. fragilis* ECF sigma factors**

Primary amino acid sequences were aligned using MUSCLE and evolutionary history was inferred by using the Maximum Likelihood method as implemented with MEGA software. A bootstrap consensus tree was inferred from 500 replicates and the percentage of replicate trees in which the associated proteins clustered together are shown next to the branches. The analysis involved 43 amino acid sequences. Each ECF sigma factor protein is represented by its BF638R gene number. If the homologous gene for the ECF sigma factor or its associated anti sigma factor was induced or repressed by oxygen exposure as shown previously in the ATCC25285 strain (Sund et al, 2008) it is indicated by the asterisks. The ECF sigma factor families according to Staron et al, 2009 are shown by the brackets and EcfO is shown with red arrow.

# Co-transcription of *ecfO* and *reo*

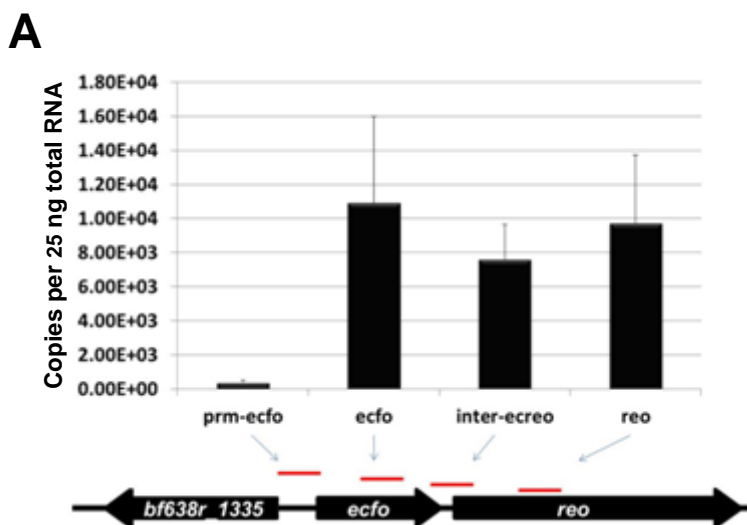

**B**

| Stock # | Primer Name      | 5'-3' Primer Sequence    | Tm   | GC%  | Product Length (bp) |
|---------|------------------|--------------------------|------|------|---------------------|
| #289    | prm-ecfo-qRT1    | ATTGAGAAAATGCAGGAAGTGATG | 58.0 | 37.5 | 157                 |
| #290    | prm-ecfo-qRT2    | TCCGACAGCTCTAATTCATTCA   | 57.3 | 40.9 |                     |
| #291    | ecfo-qRT1        | TGGTACACGACGGTTTCCTG     | 60.0 | 55   | 147                 |
| #292    | ecfo-qRT2        | TGGTCTGGTTCATCACGTCG     | 60.0 | 55   |                     |
| #293    | inter-ecreo-qRT1 | CGCGCAAAAAGTGATTGGC      | 59.3 | 50   | 181                 |
| #294    | inter-ecreo-qRT2 | CAGGCATCGGCTCCGAATAA     | 60.3 | 55   |                     |
| #295    | reo-qRT1         | GGCAGTGACGGAGGAAAAGA     | 60.0 | 55   | 191                 |
| #296    | reo-qRT2         | TACCCACTCCCATCGACCAT     | 60.0 | 55   |                     |

Fig. S4. Evidence that the *ecfO* and *reo* genes are co-transcribed in an operon. **A)** Genetic map and RNA copy number results for 4 primer pairs located in the region of the *ecfO* locus. qRT-PCR reactions were performed using RNA obtained from the wild type strain, 638R, grown to mid-logarithmic phase cell in TYG medium under anaerobic conditions. Reactions were performed on two independent RNA samples. The locations of the amplicons produced by the primer pairs are shown by the red lines above the genetic map of the *ecfO* region. **B)** The sequence and properties of the corresponding primers is shown.

## Supplemental cloning procedures and construction of pHT1045 and pHT1146

A construct was designed to delete the sequences coding for amino acids 45-123 of the *ecfO* gene. A 881bp upstream PCR fragment containing 5'-*HindIII* and 3'-*Sall* modifications, was amplified from chromosomal DNA using the 5'-3'primers: *ecfO* Nterm del-*HindIII* and Fwd/sigOD Nterm del-*Sall*-Rev respectively. A 861bp downstream PCR fragment containing 5'- *Sall* and 3'- *HindIII* modifications, was amplified from chromosomal DNA using the 5'-3'primers: *ecfO* Cterm del-*Sall*-Fwd and *ecfO* Cterm del-*HindIII*- respectively. After sub-cloning into pUC19, fragments were ligated into the *Bacteroides* suicide vector pYT102 (1) to create a 237bp deletion. The plasmid was mobilized into *B. fragilis* ADB77, and following confirmation of the double-crossover allelic exchange, the mutant strain was reverted back to thymine prototrophy (1)

The BF638R1337 marked mutant was created by using a similar strategy, except that the deleted portion of the gene was replaced by a tetracycline resistance cassette, and the suicide vector used was pFD516. To delete *reo* (BF638R1337), an 875bp *PstI*-*BamHI* "upstream" fragment (amplified with primers: AntiODN-*PstI*\_FWD/ AntiODN-*BamHI*\_REV) and an 820bp *BamHI*-*EcoRI* "downstream" fragment (amplified with primers AntiODC-*BamHI*\_FWD/AntiODC-*EcoRI*\_REV) were cloned by three fragment ligation into the *PstI*/*EcoRI* multiple cloning site of pFD516. The *tetQ* containing cassette was cloned into the *BamHI* site of the construct to generate the suicide vector used to knock out the *reo* gene.

Recombinant constructs for affinity tagged protein expression in *E.coli* were generated after amplifying coding sequences for the respective genes using gene specific primers containing *BamHI* and *EcoRI* sites in the forward and reverse primers respectively. PCR products were cloned into the multiple cloning sites of either pET32a or pGEX4T-1. Sequence integrity was verified by gene sequencing, and protein expression was verified before and after IPTG induction of expression, by coomassie staining and/or western blotting.

Recombinant constructs for affinity tagged protein expression in *B. fragilis* were generated as follows: The primers pET32\_*SmaI*-Fwd and pET32-*SmaI*-Rev were used to amplify the coding region of  $\Delta ecfO$ , multiple cloning sites and sequences for the flanking tags from the his-tag expression vector pET32a-sigmat. This was sub-cloned into the *SmaI* site of pFD1045, in front of the *osu* promoter. To include an *ahpC* derived ribosome binding site, the resulting template was used to amplify another PCR product using the primers RBS-*BamHI*HIS-Fwd and *EcoRI*His-REV, and cloned into the *BamHI*/*SmaI* site of pFD1146 and pFD1045 to generate pHT1146 and pHT1045 (see supplemental data Figure S3) respectively. Dual his-tagged proteins were subsequently generated by cloning and replacing the fragments between *BglII* and *XhoI*.

Table S1: Primers used in this study

| PRIMER                       | 5'-3' - SEQUENCE                                    | Purpose                                                |
|------------------------------|-----------------------------------------------------|--------------------------------------------------------|
| 1335-GSP1.1                  | CCCAATTGATTGGGGGAGTCATTAAAGGC                       | BF638R1335 - 5' RACE Gene specific primer              |
| 1335-GSP2                    | CTGTGACGTTGATACGGTCG                                | BF638R1335 - 5' RACE Gene specific primer              |
| 1335-GSP2.2                  | CCGTCAGTGGGATGATCTCTTTTCGTC                         | BF638R1335 - 5' RACE Gene specific primer              |
| 1355rbsBamHI Fwd             | GACTGGATCCGCATTTTCTCAATACAATAAAGAATA<br>AATCTCAATGG | BF638R1335 cloning and expression in Bacteroides       |
| Hyp1335-BglII-Fwd(52.6)      | GACTAGATCT<br>TATGAAGAAATTTAATTTAATAACTTTTGCCG      | BF638R1335 cloning and expression in Bacteroides       |
| Hyp1335-XhoI-Rev(52.4)       | GACTCTCGAGTTGAGAATGAAATGATTTTATTTTA<br>AGTTTTTG     | BF638R1335 cloning and expression in Bacteroides       |
| 1335 EcoRI Rev               | GACTGAATTC<br>GCCTGATTGTGTAGGTGTTTCTTGTTGTTTTA      | BF638R1335 cloning and expression procedures           |
| 1355 BamHI Fwd               | GACTGGATCC<br>ATGAAGAAATTTAATTTAATAACTTTTGCCG       | BF638R1335 cloning and expression procedures           |
| 1335 delCFwd                 | GACTGGATCCAACATCAGGATGACGGCAAAGTTA                  | BF638R1335 knockout construct procedures               |
| <i>AntsgODN-EcoRI-R2</i>     | GACTGAATTCTTAACGGATTTTCATCAGCTACCGGAC               | BF638R1335 knockout/BF638R1337 N+TM cloning procedures |
| OxyR_BamHIFWD                | GACTGGATCCATGACTATACAACAATTGGAATATA<br>TTCTGGCTGT   | BF638R1335 mutation procedures                         |
| OxyR-EcoRBamHRev             | GACTGGATCCGAATTCTTATAACCAGACACTGAACG<br>GCCTGCAGGG  | BF638R1335 mutation procedures                         |
| F-sigOD-RBS-<br>BamHI(atsOD) | GACTGGATCCTACTGAGGTGAACCTTGATTTTC                   | BF638R1337 cloning and expression in Bacteroides       |
| AntiOC1-HindIII_Rev          | TAGCAAGCTTTTAATAAGTGAATCGCAATCCTGCCT<br>GC          | BF638R1337 cloning procedures                          |
| AntiSigOD -BamHI_FWD         | GACTGGATCCATGATGAAAGAAGACGAAAA                      | BF638R1337 cloning procedures                          |
| AntiSigOD-EcoRI_REV          | GACTGAATTCATAAGTGAATCGCAATCCTGC                     | BF638R1337 cloning procedures                          |
| <i>AntSgOD-BamHI-F</i>       | GACTGGATCCATGATGAAAGAAGACGAAAAATGG<br>ATT           | BF638R1337 cloning procedures                          |
| ATS-N-BamHI Rev              | GACTGGATCCGTGAAGGAGCCGTTGCATAACGG                   | BF638R1337 cloning procedures                          |
| ATS-OD-SmaI_REV              | GACTCCCGGGTTAATAAGTGAATCGCAATCCTGC                  | BF638R1337 cloning procedures                          |



| PRIMER                             | 5'-3' - SEQUENCE                                           | Purpose                                              |
|------------------------------------|------------------------------------------------------------|------------------------------------------------------|
| ATS-OD-XhoI_REV                    | GACTCTCGAGATAAGTGAATCGCAATCCTGCCTGC<br>A                   | BF638R1337 cloning procedures                        |
| ATS-OD-XhoI_stopREV                | GACTCTCGAGTTAATAAGTGAATCGCAATCCTGCCT<br>GCA                | BF638R1337 cloning procedures                        |
| <i>Bam</i> HIR del_ASTM            | GACTGGATCCCATTCTATTTTCATTTTTGAAATCCAA<br>GGTTCAC           | BF638R1337 cloning procedures                        |
| AntiSigODΔTM -<br>BamHI_FWD        | GACTGGATCCGCTGATGAAATCCGTTATGCAAC                          | BF638R1337 cloning procedures for C-term expression  |
| AntiODC- <i>Bam</i> HI_FWD         | GACTGGATCCACCATCCGAAAAGAAAGGC                              | BF638R1337 knockout construct procedures             |
| AntiODC- <i>Eco</i> RI_REV         | GACTGAATTCTATCACTTTTCCGGCGGAG                              | BF638R1337 knockout construct procedures             |
| AntiODN- <i>Bam</i> HI_REV         | GACTGGATCCAGCTTATCCTTGAATGCT                               | BF638R1337 knockout construct procedures             |
| AntiODN- <i>Pst</i> I_FWD          | GACTCTGCAGCAGGATGACGGCAAAAGTTA                             | BF638R1337 knockout construct procedures             |
| <i>Antsg</i> ODN- <i>Eco</i> RI-R1 | GACTGAATTCTACCGGCGATACGGATATATTCG                          | BF638R1337 N-TM cloning procedures                   |
| pET32_Smal-Fwd                     | GACTCCCGGGGCCGTTCTGGTTCTGGCCATATG                          | Generation of <i>Bacteroides</i> his-tagged plasmid  |
| pET32-Smal-Rev                     | GACTCCCGGGCTTTCCGGCTTTGTTAGCAGCCG                          | Generation of <i>Bacteroides</i> his-tagged plasmid  |
| RBS- <i>Bam</i> IHis-Fwd           | GTACGGATCCTCTAAATAAGAAACAATTATGCACC<br>ATCATCATCATCATTCTTC | Generation of <i>Bacteroides</i> his-tagged plasmid  |
| SstI-His-REV                       | GGCCAGTGAATTCGAGCTCGGTACCCGG                               | Generation of <i>Bacteroides</i> his-tagged plasmid  |
| RBS- <i>Bam</i> IHis-Fwd           | GTACGGATCCTCTAAATAAGAAACAATTATGCACC<br>ATCATCATCATCATTCTTC | pHT1045/1147 cloning-ahpc rbs creation in pHT-vector |
| <i>Eco</i> RIHis-REV               | CAGTGAATTCGAGCTCGGTACCCGG                                  | pHT1045/1147 cloning-Final creation of pHT-vector    |
| pET32_Smal-Fwd                     | GACTCCCGGGGCCGTTCTGGTTCTGGCCATATG                          | pHT1045/1147 cloning-His tag cloning from pET32      |
| pET32-Smal-Rev                     | GACTCCCGGGCTTTCCGGCTTTGTTAGCAGCCG                          | pHT1045/1147 cloning-His tag cloning from pET33      |
| 588ChipRT1                         | GGACCTGAAACAACCTTTGCCGT                                    | qRT-PCR of BF638R0588 promoter after ChIP            |
| 588ChipRT2                         | ACCGGCAGAACAAACAACCTGCCA                                   | qRT-PCR of BF638R0588 promoter after ChIP            |
| 743ChipRT1                         | CCGGCATGCAGCTCGTGA                                         | qRT-PCR of BF638R0743 promoter after ChIP            |
| 743ChipRT2                         | TGCAATGCCGGCAGCATCAG                                       | qRT-PCR of BF638R0743 promoter after ChIP            |
| 2478ChipRT1                        | TCGACCCTCGCTACCGCTC                                        | qRT-PCR of BF638R2478 promoter after ChIP            |
| 2478ChipRT2                        | CCTGCAGCCGACAGCAGCAT                                       | qRT-PCR of BF638R2478 promoter after ChIP            |
| 2785ChipRT1                        | ACTCCGCCTTCATCCCTCCC                                       | qRT-PCR of BF638R2785 promoter after ChIP            |

| <b>PRIMER</b>               | <b>5'-3' - SEQUENCE</b>    | <b>Purpose</b>                                             |
|-----------------------------|----------------------------|------------------------------------------------------------|
| 2785ChipRT2                 | ACCACTGAGAAAGCAATCGCA      | qRT-PCR of BF638R2785 promoter after ChIP                  |
| 4448ChIpRT1                 | GGTTGTTGCCGTTGATGCCCCG     | qRT-PCR of BF638R4448 promoter after ChIP                  |
| 4448ChIpRT2                 | GCGCCCCGATTACTGTATCGTAGCC  | qRT-PCR of BF638R4448 promoter after ChIP                  |
| sigChip-RT-1                | TGAGAAAATGCAGGAAGTGATG     | qRT-PCR of sigOD/BF638R1335 promoter after ChIP            |
| sigChip-RT-2                | AATTCATTCATTCTCCTAAACACG   | qRT-PCR of sigOD/BF638R1335 promoter after ChIP            |
| 588RT1                      | GGGGCAAATCCGTCTGACCCA      | qRT-PCR transcript quantification of BF638R0588 expression |
| 588RT2                      | GCCGGTTTAGCCGGTGTAAACGG    | qRT-PCR transcript quantification of BF638R0588 expression |
| 743RT1                      | GCCGATAGACGGGCAACGGG       | qRT-PCR transcript quantification of BF638R0743 expression |
| 743RT2                      | TCCCCGCCGATCCACATCA        | qRT-PCR transcript quantification of BF638R0743 expression |
| 1335RT-1                    | CGACCGTATCAACGTCACAG       | qRT-PCR transcript quantification of BF638R1335 expression |
| 1335RT-2                    | CAATTGATTGGGGGAGTCAT       | qRT-PCR transcript quantification of BF638R1335 expression |
| antiSigOD-RT1               | GCTGTCAACCCGGATGTATT       | qRT-PCR transcript quantification of BF638R1337 expression |
| antiSigOD-RT2               | CTCTTTTCTCCGTCCTACTGC      | qRT-PCR transcript quantification of BF638R1337 expression |
| 16SRT1-F                    | GATGCGTTCATTAGGTTGTTG      | qRT-PCR transcript quantification of BF638R-16S expression |
| 16SRT2-F                    | CACTGCTGCCTCCCGTAG         | qRT-PCR transcript quantification of BF638R-16S expression |
| 2478RT1                     | CGGTTGTTGCGTTTTCCCCGC      | qRT-PCR transcript quantification of BF638R2478 expression |
| 2478RT2                     | CCACCCGTTGCAGGCATGGT       | qRT-PCR transcript quantification of BF638R2478 expression |
| 2785RT1                     | TGCAGCCGTAGAAGGCCAGGA      | qRT-PCR transcript quantification of BF638R2785 expression |
| 2785RT2                     | AGTACCGCTACGCTGCCAGT       | qRT-PCR transcript quantification of BF638R2785 expression |
| 4448RT1                     | GGAGCTGTGCATACGGGCGA       | qRT-PCR transcript quantification of BF638R4448 expression |
| 4448RT2                     | TGCCACCTGTAAATCCACCGGC     | qRT-PCR transcript quantification of BF638R4448 expression |
| 1261 R7 Fwd (Gee)           | GACGGTTTCTGAAGATTTT        | qRT-PCR transcript quantification of sigOD                 |
| 1261 RT Rev (Gee)           | GGGGAGTTCATTAATAAATTGC     | qRT-PCR transcript quantification of sigOD                 |
| sigOD-GSP2.2                | GAATACGGTACGATATCCGGCGGG   | sigOD - 5' RACE Gene specific primer                       |
| sigOD-GSP2/1261P            | GAGCTCTAACGAAGACAGACACCAAG | sigOD - 5' RACE Gene specific primer                       |
| SigOD-RT2                   | AGCATCCGGTTCTTCATACG       | sigOD - 5' RACE Gene specific primer                       |
| sigOD Cterm del-SalI-Fwd    | GTCGACATTAATGAACTCCCCGCCG  | sigOD 3' deletion-Forward primer                           |
| sigOD Cterm del-HindIII-Rev | AAGCTTATTACCGATACCCACTCCCA | sigOD 3' deletion-Reverse primer                           |

| <b>PRIMER</b>               | <b>5'-3' - SEQUENCE</b>                      | <b>Purpose</b>                                                    |
|-----------------------------|----------------------------------------------|-------------------------------------------------------------------|
| sigOD Nterm del-HindIII-Fwd | AAGCTTCAGGATGACGGCAAAGTTA                    | sigOD 5' deletion-Forward primer                                  |
| sigOD Nterm del-Sall-Rev    | GTCGACTTGTGCCATGTCCCTGTCTCC                  | sigOD 5' deletion-Reverse primer                                  |
| F-sigOD-RBS-BamHI           | GACTGGATCCTTTGCTGCATTTATAAGGTAAACAC<br>G     | sigOD cloning and expression of his-tagged protein in Bacteroides |
| SigOD BglIII-Fwd            | GACTAGATCTAATGAATGAATTAGAGCTGTCGGAA<br>CGTTG | sigOD cloning and expression of his-tagged protein in Bacteroides |
| SigOD-NotI-Rev              | GACTGCGGCCGCACCATTGGTCACCAACCATTCTTT<br>C    | sigOD cloning and expression of his-tagged protein in Bacteroides |
| SigOD-BamHI_FWD             | GACTGGATCCATGAATGAATTAGAGCTGTCTG             | sigOD cloning and expression procedures                           |
| SigOD-EcoRI_REV             | GACTGAATTCTCAACCATTGGTCACCAACC               | sigOD cloning and expression procedures                           |

Table S2. The most highly EcfO-induced genes

| Gene           | FUNCTION                                                                 | Fold Induced | Log2 Expression          |                   |
|----------------|--------------------------------------------------------------------------|--------------|--------------------------|-------------------|
|                |                                                                          |              | reo <sup>-</sup> + pEcfO | ecfO <sup>-</sup> |
| BF638R0588     | conserved hypothetical protein                                           | 111.7442627  | 14.73195                 | 7.92789           |
| BF638R1335     | conserved hypothetical protein                                           | 29.47000504  | 13.41907                 | 8.5379            |
| BF638R4448     | hypothetical protein                                                     | 24.5636692   | 12.33397                 | 7.71551           |
| BF638R4447     | putative radical SAM-family protein                                      | 19.7859726   | 12.47337                 | 8.16696           |
| BF638R0743     | conserved hypothetical protein                                           | 18.09102821  | 14.86485                 | 10.68765          |
| BF638R1336     | putative RNA polymerase ECF-type sigma factor                            | 11.48988056  | 11.68544                 | 8.16315           |
| BF638R1438     | PSA-putative aminotransferase                                            | 9.70788002   | 12.88607                 | 9.60691           |
| BF638R2513     | putative lipoprotein                                                     | 9.347043991  | 13.33456                 | 10.11005          |
| BF638R1436     | PSA-putative WxcM-like protein                                           | 9.10241127   | 11.49662                 | 8.31037           |
| BF638R1434     | PSA-putative LPS biosynthesis related transcriptional regulatory protein | 9.033407211  | 12.44713                 | 9.27186           |
| BF638R2785     | putative exported protein                                                | 8.58799839   | 14.23393                 | 11.13161          |
| BF638R1459     | PSA-putative DegT/DnrJ/EryC1/StrS family amino sugar synthetase          | 8.383256912  | 11.13367                 | 8.06616           |
| BF638R1435     | PSA-putative UDP-GlcNAc 2-epimerase                                      | 7.93455267   | 11.33672                 | 8.34857           |
| BF638R1445     | PSA-putative phosphoheptose isomerase                                    | 7.485687733  | 11.73781                 | 8.83367           |
| BF638R0780     | PSG-putative LPS biosynthesis related DNTP-hexose dehydratase-epime      | 7.13273859   | 9.87614                  | 7.04168           |
| BF638R1433     | PSA-putative LPS biosynthesis related transcriptional regulatory protein | 6.900640488  | 9.50119                  | 6.71446           |
| BF638R3487     | PSH-putative LPS biosynthesis related glycosyltransferase                | 6.819730282  | 9.86954                  | 7.09982           |
| BF638R1449;BF6 | PSA-putative sugar epimerase (pseudogene)                                | 6.801920414  | 12.70029                 | 9.93434           |
| BF638R1446     | PSA-putative nucleotidyl transferease                                    | 6.478909492  | 10.22876                 | 7.53301           |
| BF638R1437     | PSA-putative WbbJ-like protein                                           | 6.460772038  | 12.52453                 | 9.83283           |
| BF638R1435.2   | PSA-putative WxcM-like protein                                           | 6.336722374  | 9.79084                  | 7.1271            |
| BF638R1442     | PSA-putative GHMP kinase                                                 | 6.333642483  | 10.72191                 | 8.05888           |
| BF638R3483     | PSH-putative LPS biosynthesis related DNTP-hexose dehydratase-epime      | 6.19905138   | 9.33759                  | 6.70554           |
| BF638R1443     | PSA-putative Nucleoside diphosphate sugar epimerase                      | 6.13068676   | 10.15091                 | 7.53486           |
| BF638R0777     | PSG-putative transcriptional regulator                                   | 6.020931244  | 9.34317                  | 6.75319           |
| BF638R2297     | putative cation efflux-related lipoprotein                               | 5.986685753  | 7.61941                  | 5.03765           |
| BF638R0778     | PSG-putative UDP-glucose 6-dehydrogenase                                 | 5.869164944  | 8.88114                  | 6.32798           |
| BF638R0782     | PSG-putative LPS biosynthesis related DNTP-hexose dehydratase-epime      | 5.82514286   | 8.3338                   | 5.7915            |
| BF638R1451     | PSA-putative isomerase protein                                           | 5.800650597  | 9.08185                  | 6.54564           |
| BF638R1440     | PSA-putative transmembrane protein                                       | 5.507408142  | 11.686                   | 9.22463           |
| BF638R1460     | PSA-undecaprenyl-phosphate galactose phosphotransferase                  | 5.330198288  | 10.55132                 | 8.13714           |

|                |                                                                          |             |          |         |
|----------------|--------------------------------------------------------------------------|-------------|----------|---------|
| BF638R1448     | PSA-hypothetical protein                                                 | 5.256542683 | 11.46113 | 9.06702 |
| BF638R1447     | PSA-putative glycosyl transferase                                        | 5.240895271 | 9.6069   | 7.21708 |
| BF638R1867     | PSB-putative LPS biosynthesis related phosphoenolpyruvate phosphom       | 5.175365925 | 11.23558 | 8.86392 |
| BF638R1453     | PSA-putative glycosyl transferase                                        | 5.100131512 | 8.98504  | 6.6345  |
| BF638R1439     | PSA-putative transmembrane protein                                       | 5.060304642 | 8.83592  | 6.49669 |
| BF638R1458     | PSA-putative 3-oxoacyl-[acyl-carrier-protein] synthase III               | 5.034759998 | 11.31067 | 8.97874 |
| BF638R1868     | PSB-putative LPS biosynthesis related phosphoenolpyruvate decarboxyl     | 4.949240685 | 11.01309 | 8.70588 |
| BF638R1454     | PSA-putative LPS biosynthesis related glucose-1-phosphate thymidyltr     | 4.942656994 | 10.19793 | 7.89264 |
| BF638R3762     | putative spore coat polysaccharide biosynthesis protein E                | 4.858386517 | 8.32597  | 6.04549 |
| BF638R1444     | PSA-putative histidine biosynthesis protein                              | 4.782286167 | 9.13631  | 6.87861 |
| BF638R1457     | PSA-putative 3-oxoacyl-[acyl-carrier-protein] reductase                  | 4.767580509 | 9.86133  | 7.60807 |
| BF638R1869     | PSB-putative LPS biosynthesis related 2-aminoethylphosphonate pyruva     | 4.712154388 | 10.94265 | 8.70626 |
| BF638R0783;BF6 | PSG-Nucleoside-diphosphate-sugar epimerases;pseudo Nucleoside-diph       | 4.614230633 | 9.47308  | 7.26699 |
| BF638R1456     | PSA-putative acyl carrier protein                                        | 4.583328724 | 9.5046   | 7.3082  |
| BF638R3771     | conserved hypothetical protein                                           | 4.550801277 | 8.0973   | 5.91118 |
| BF638R1878     | PSB-putative LPS biosynthesis related dehydratase                        | 4.538176537 | 9.13338  | 6.95126 |
| BF638R3766     | putative LPS biosynthesis related aldo/keto reductase                    | 4.447082043 | 7.67437  | 5.52151 |
| BF638R1866     | PSB-putative glucose-1-P-cytidyltransferase                              | 4.381814003 | 7.87962  | 5.74809 |
| BF638R3488     | PSH-putative LPS biosynthesis related transcriptional regulatory protein | 4.369565487 | 7.70001  | 5.57252 |
| BF638R1441     | PSA- hypothetical protein                                                | 4.310743809 | 9.892    | 7.78406 |
| BF638R0779     | PSG-putative LPS biosynthesis-related sugar-phosphate nucleotidyltrans   | 4.218164921 | 10.52475 | 8.44813 |
| BF638R3473     | PSH-putative LPS biosynthesis related dTDP-4-dehydrorhamnose 3,5-ep      | 4.218022346 | 9.93061  | 7.85405 |
| BF638R0789     | PSG-putative capsular polysaccharide biosynthesis protein                | 4.198000908 | 9.69671  | 7.62701 |
| BF638R3489     | PSH-putative LPS biosynthesis related transcriptional regulatory protein | 4.137679577 | 9.10053  | 7.05171 |
| BF638R1455     | PSA-putative transmembrane protein                                       | 4.131970882 | 11.00367 | 8.95684 |
| BF638R3482     | PSH-DNTP-hexose dehydratase-epimerase                                    | 4.069438934 | 6.99655  | 4.97172 |
| BF638R0781     | PSG-conserved hypothetical protein                                       | 4.033638954 | 9.35381  | 7.34172 |
| BF638R3774     | putative transcriptional regulator                                       | 3.955482721 | 10.19313 | 8.20927 |
| BF638R3484     | PSH-putative LPS biosynthesis related DNTP-hexose dehydratase-epime      | 3.896668911 | 10.02625 | 8.06401 |
| BF638R1088     | putative LPS biosynthesis related dehydratase                            | 3.76634407  | 9.44236  | 7.52919 |
| BF638R3481     | PSH-putative LPS biosynthesis related polysaccharide transporter/flippa  | 3.740711689 | 6.98784  | 5.08453 |
| BF638R3767     | putative DegT/DnrJ/EryC1/StrS aminotransferase family O-antigen relat    | 3.735872507 | 9.72285  | 7.8214  |
| BF638R0792     | PSG-putative glycosyltransferase                                         | 3.663678646 | 7.19932  | 5.32603 |
| BF638R3763     | putative LPS biosynthesis related Acetyltransferase                      | 3.633581638 | 7.21743  | 5.35604 |

|                |                                                                           |             |          |          |
|----------------|---------------------------------------------------------------------------|-------------|----------|----------|
| BF638R1880     | PSB-putative LPS biosynthesis related reductase                           | 3.613710403 | 8.61318  | 6.7597   |
| BF638R3474     | PSH-putative LPS biosynthesis related glucose-1-phosphate thymidyltr      | 3.560186625 | 9.18352  | 7.35156  |
| BF638R0790     | PSG-putative aminotransferase                                             | 3.514712572 | 9.78426  | 7.97086  |
| BF638R3768     | putative LPS biosynthesis related                                         | 3.501204491 | 10.14106 | 8.33321  |
| BF638R1452     | PSA-hypothetical protein                                                  | 3.481672287 | 7.9716   | 6.17182  |
| BF638R0810     | putative DegT/DnrJ/EryC1/StrS family aminotransferase protein             | 3.425355911 | 9.42759  | 7.65134  |
| BF638R0796;BF6 | PSG-putative transmembrane polysaccharide modification protein;puta       | 3.345911026 | 6.65732  | 4.91493  |
| BF638R1090     | putative epimerase                                                        | 3.34011364  | 9.37894  | 7.63904  |
| BF638R1862     | PSB- putative LPS biosynthesis related transcriptional regulatory proteir | 3.303390741 | 7.44866  | 5.72472  |
| BF638R0791     | PSG-putative sugar-phosphate nucleotidyl transferase                      | 3.289512634 | 8.01087  | 6.29299  |
| BF638R0787     | PSG-putative transmembrane protein                                        | 3.272656918 | 6.68375  | 4.97328  |
| BF638R0121     | putative RNA helicase dead-box protein                                    | 3.270205498 | 12.15492 | 10.44554 |
| BF638R1576     | hypothetical protein                                                      | 3.263440132 | 8.97657  | 7.27018  |
| BF638R1865     | PSB-putative LPS biosynthesis related membrane protein                    | 3.232635498 | 9.07723  | 7.38452  |
| BF638R2298     | putative cation efflux-related membrane protein                           | 3.219130278 | 8.01012  | 6.32345  |
| BF638R2681     | anthranilate phosphoribosyltransferase                                    | 3.206250429 | 10.20176 | 8.52087  |
| BF638R1857     | putative GDP mannose 4,6-dehydratase                                      | 3.195005894 | 9.86048  | 8.18466  |
| BF638R0397     | putative exported protein                                                 | 3.187184095 | 10.73887 | 9.06658  |
| BF638R3751     | putative epimerase/dehydratase                                            | 3.173950195 | 10.14584 | 8.47956  |
| BF638R4446     | putative two-component system sensor kinase/response regulator fusic      | 3.160017967 | 6.56584  | 4.90591  |
| BF638R0398     | putative TonB-dependent outer membrane exported protein                   | 3.153612375 | 11.66213 | 10.00513 |
| BF638R3750     | putative LPS biosynthesis related glycosyl transferase                    | 3.117562532 | 9.22284  | 7.58242  |
| BF638R1670     | putative ATP-dependent RNA helicase                                       | 3.093675137 | 9.90395  | 8.27463  |
| BF638R1960     | putative TonB-dependent outer membrane receptor protein                   | 3.076897383 | 9.50805  | 7.88657  |
| BF638R1863     | PSB-putative LPS biosynthesis related transcriptional regulatory protein  | 3.074262619 | 7.86105  | 6.24081  |
| BF638R3772     | hypothetical protein                                                      | 3.044889927 | 7.86415  | 6.25776  |
| BF638R2911     | putative uroporphirinogen biosynthesis-related protein                    | 3.023969889 | 6.68034  | 5.0839   |
| BF638R0793     | putative polysaccharide biosynthesis protein                              | 2.923807383 | 6.98472  | 5.43687  |
| BF638R3755     | putative UDP-GlcNAc 2-epimerase                                           | 2.913910389 | 6.37233  | 4.82937  |
| BF638R1879     | PSB-putative LPS biosynthesis related epimerase                           | 2.909437418 | 7.3863   | 5.84556  |
| BF638R3775     | PSD-putative transcriptional regulator                                    | 2.907203674 | 11.00763 | 9.468    |
| BF638R3472     | PSH-putative LPS biosynthesis related conserved hypothetical protein      | 2.89193964  | 9.377    | 7.84497  |
| BF638R3765     | putative LPS biosynthesis related protein                                 | 2.884479523 | 7.17745  | 5.64914  |
| BF638R3770     | putative LPS biosynthesis related dehydratase                             | 2.881490469 | 8.6009   | 7.07409  |

|            |                                                                    |             |          |          |
|------------|--------------------------------------------------------------------|-------------|----------|----------|
| BF638R1864 | PSB-putative glucose-1-phosphate thymidyl transferase              | 2.864048243 | 7.42402  | 5.90597  |
| BF638R2718 | putative cobalamin biosynthesis-related protein                    | 2.863596916 | 12.28069 | 10.76286 |
| BF638R1875 | PSB-putative LPS biosynthesis related alpha-1,2-fucosyltransferase | 2.840957642 | 8.5516   | 7.04522  |
| BF638R1577 | hypothetical protein                                               | 2.833425999 | 8.2959   | 6.79335  |
| BF638R0745 | putative transmembrane AAA-metalloprotease FtsH                    | 2.831279993 | 12.09897 | 10.59752 |
| BF638R3045 | putative nitroreductase                                            | 2.828022003 | 10.94659 | 9.4468   |

**Table S3. Genes induced following ectopic expression of *ecfO* in three model systems.**

| BFR638R<br>Gene | Function                                               | Fold Induction (rank) <sup>a</sup> |                      |                           |
|-----------------|--------------------------------------------------------|------------------------------------|----------------------|---------------------------|
|                 |                                                        | IPTG <sup>b</sup>                  | Maltose <sup>c</sup> | Constitutive <sup>d</sup> |
| <i>0588</i>     | NigD family lipoprotein with secretion signal sequence | 296 (1)                            | 235 (2)              | 74 (1)                    |
| <i>1335</i>     | NigD family lipoprotein with secretion signal sequence | 86 (2)                             | 258 (1)              | 27 (8)                    |
| <i>0743</i>     | NigD family lipoprotein with secretion signal sequence | 64 (3)                             | 105 (3)              | 27 (7)                    |
| <i>2513</i>     | lipoprotein with secretion signal sequence             | 63 (4)                             | 6 (8)                | 50 (3)                    |
| <i>2785</i>     | lipoprotein with possible secretion signal sequence    | 48 (5)                             | 19 (4)               | 67 (2)                    |
| <i>4448</i>     | putative lipoprotein, rSAM/lipoprotein system          | 32 (6)                             | 4 (31)               | 17 (9)                    |
| <i>4447</i>     | radical SAM family lipoprotein                         | 22 (7)                             | 8 (6)                | 29 (6)                    |
| <i>ecfO</i>     | ECF sigma factor                                       | 6                                  | <sup>e</sup> 1.5     | 71                        |
| <i>reo</i>      | antisigma factor                                       | NR                                 | NR                   | 12                        |

<sup>a</sup> Rank is descending from the most highly expressed gene for a given experiment. The microarray expression data are available from the NCBI Gene Expression Omnibus under accession # GSE35539.

<sup>b</sup> IPTG induced expression of *ecfO* from pFD1146-*ecfO* in the *reo* mutant IB525. Induction is relative to empty vector in the *ecfO* mutant background IB524.

<sup>c</sup> Maltose induce expression of *ecfO* from pHT1045-*ecfO* in the *ecfO/reo* double mutant IB526. Induction is relative to the vector containing the  $\Delta$ *ecfO* gene in same IB526 background.

<sup>d</sup> Constitutive expression of *ecfO* during anaerobic, mid-logarithmic phase growth from pFD340-*ecfO* in the wild-type strain IB289 (ATCC25285). Fold induction is relative to empty vector in IB289. Orthologues of the IB289 genes to BFR638R genes *588*, *743*, *1335*, *ecfOD*, *rsoD*, *2513*, *2785*, *4447*, *4448* are respectively *540*, *700*, *1319*, *1320*, *1321*, *2551*, *2776*, *4287* and *4288*.

<sup>e</sup> Low induction values are misleading due to the high background resulting from expression of mRNA from the mutated  $\Delta$ *ecfO* gene which is detected by microarray probes (see text).
